# Supplementary material for: Genomic features of “Candidatus Venteria ishoeyi”, a new sulfur-oxidizing macrobacterium from the Humboldt Sulfuretum off Chile
Source: PubMed Central journal article supplement (PMC5728499; doi:10.1371/journal.pone.0188371), 2017-12-13
Supplement: pone.0188371.s003.pdf [file pone.0188371.s003.pdf]

**S1 Table. Identification of amplified filaments by SeqMatch function (Ribosomal Database Project, RDPII).**

| Date    | Query name | S_ab_score | Sequence name (RDP SeqMatch to cultured isolates)                    | Form                 |
|---------|------------|------------|----------------------------------------------------------------------|----------------------|
| 12/8/08 | MDA1*      | 0,615      | " <i>Beggiatoa</i> " sp. MS-81-1c;AF1102276                          | Gammaproteobacterium |
| 12/8/08 | MDA2*      | 0,617      | " <i>Beggiatoa</i> " sp. MS-81-1c;AF1102276                          | Gammaproteobacterium |
| 12/8/08 | MDA3       | 0,797      | <i>Maorithyas hadalis</i> gill thioautotrophic symbiont II; AB188780 | Gammaproteobacterium |
| 12/8/08 | MDA5*      | 0,613      | " <i>Beggiatoa</i> " sp. MS-81-1c;AF1102276                          | Gammaproteobacterium |
| 12/8/08 | MDA6np     | 0,615      | <i>Desulfonema magnum</i> (T); DSM2077                               | Deltaproteobacterium |

Asterisks indicate the MDA-DNAs selected to be sequenced by 454 GS FLX technology.
