# Supplementary material for: Genomic features of “Candidatus Venteria ishoeyi”, a new sulfur-oxidizing macrobacterium from the Humboldt Sulfuretum off Chile
Source: PubMed Central journal article supplement (PMC5728499; doi:10.1371/journal.pone.0188371), 2017-12-13
Supplement: pone.0188371.s004.pdf [file pone.0188371.s004.pdf]

**S2 Table. Genes coding for sulfur oxidation enzymes in “*Ca. V. ishoeyi*”.**

| Abbreviation | Enzyme                                    | Gene  | Locus tag  | Scaffold | CDS start | CDS end |
|--------------|-------------------------------------------|-------|------------|----------|-----------|---------|
| Fcc          | Flavocytochrome c/sulfide dehydrogenase   | fccA  | MBHS_04615 | scf_492  | 4803      | 5120    |
|              |                                           | fccA  | MBHS_04676 | scf_492  | 69279     | 69596   |
|              |                                           | fccB  | MBHS_04616 | scf_492  | 5130      | 6425    |
|              |                                           | fccB  | MBHS_04675 | scf_492  | 68727     | 69269   |
| Sqr          | Sulfide:quinone oxido-reductase           | sqr   | MBHS_00764 | scf_126  | 28830     | 29954   |
| Sox          | Thiosulfate-oxidizing Sox enzyme system   | soxAX | MBHS_04050 | scf_485  | 10893     | 11720   |
|              |                                           | soxAX | MBHS_04079 | scf_486  | 12880     | 13710   |
|              |                                           | soxY  | MBHS_04077 | scf_486  | 11826     | 12290   |
|              |                                           | soxZ  | MBHS_04078 | scf_486  | 12396     | 12710   |
| Dsr          | Dissimilatory sulfite reductase system    | dsrA  | MBHS_03945 | scf_483  | 96302     | 97564   |
|              |                                           | dsrB  | MBHS_03946 | scf_483  | 97627     | 98691   |
|              |                                           | dsrE  | MBHS_03947 | scf_483  | 98711     | 99103   |
|              |                                           | dsrF  | MBHS_03948 | scf_483  | 99205     | 99621   |
|              |                                           | dsrH  | MBHS_03949 | scf_483  | 99635     | 99940   |
|              |                                           | dsrC  | MBHS_03950 | scf_483  | 100001    | 100336  |
|              |                                           | dsrM  | MBHS_03951 | scf_483  | 100464    | 101213  |
|              |                                           | dsrK  | MBHS_03952 | scf_483  | 101238    | 102764  |
|              |                                           | dsrL  | MBHS_03953 | scf_483  | 102861    | 104804  |
|              |                                           | dsrJ  | MBHS_03954 | scf_483  | 104882    | 105409  |
|              |                                           | dsrO  | MBHS_03955 | scf_483  | 105406    | 106161  |
|              |                                           | dsrP  | MBHS_03956 | scf_483  | 106172    | 107377  |
| Apr          | Adenylylsulfate reductase (APS reductase) | aprA  | MBHS_04595 | scf_491  | 176146    | 178143  |
|              |                                           | aprB  | MBHS_04596 | scf_491  | 178235    | 178708  |
| Hdr          | Heterodisulfide reductase                 | hdrA  | MBHS_00323 | scf_51   | 50915     | 51511   |
|              |                                           | hdrB  | MBHS_00322 | scf_51   | 50254     | 50865   |
| Sat          | Sulfate adenylyltransferase               | sat   | MBHS_00245 | scf_47   | 46029     | 47222   |
