# Supplementary material for: Genomic features of “Candidatus Venteria ishoeyi”, a new sulfur-oxidizing macrobacterium from the Humboldt Sulfuretum off Chile
Source: PubMed Central journal article supplement (PMC5728499; doi:10.1371/journal.pone.0188371), 2017-12-13
Supplement: pone.0188371.s005.pdf [file pone.0188371.s005.pdf]

**S3A Table. Genes involved in the Tricarboxylic acid cycle identified in “*Ca V. ishoei*”.**

| Tricarboxylic acid cycle                                             |                 |                                        |                               |                         |
|----------------------------------------------------------------------|-----------------|----------------------------------------|-------------------------------|-------------------------|
| Product                                                              | Gene            | Locus                                  | Scaffold ID                   | Protein sequence length |
| Citrate synthase (type I and II)                                     | gltA            | Not in “ <i>CaVi</i> ”                 | n.d                           | n.d                     |
| Citrate synthase                                                     | aarA            | MBHS_02352                             | scf_441                       | 432                     |
| Aconitate hydratase I and II                                         | acnA/acnB       | MBHS_02556                             | scf_450                       | 852                     |
| Isocitrate dehydrogenase                                             | icd             | MBHS_03490                             | scf_477                       | 292                     |
| 2-oxoglutarate dehydrogenase E1                                      | sucA            | MBHS_00167                             | scf_042                       | 970                     |
| Dihydrolipoyl succinyltransferase E2                                 | sucB            | MBHS_01480<br>MBHS_04108               | scf_339<br>scf_487            | 93<br>531               |
| Succinyl-CoA synthetase, beta subunit                                | sucC            | MBHS_04498                             | scf_491                       | 390                     |
| Succinyl-CoA synthetase, alpha subunit                               | sucD            | MBHS_04499                             | scf_491                       | 290                     |
| Succinate dehydrogenase/ fumarate reductase, flavoprotein subunit    | sdhA            | MBHS_00714<br>MBHS_03266               | Scf_123<br>scf_473            | 128<br>598              |
| Succinate dehydrogenase/ fumarate reductase, iron-sulfur subunit     | sdhB            | MBHS_00390                             | scf_553                       | 259                     |
| Succinate dehydrogenase/ fumarate reductase, cytochrome b556 subunit | sdhC            | MBHS_03220                             | scf_472                       | 126                     |
| Succinate dehydrogenase/ fumarate reductase, membrane anchor         | sdhD            | Not in “ <i>CaVi</i> ”                 | n.d                           | n.d                     |
| Fumarate hydratase                                                   | fumAB<br>(fumB) | MBHS_00665                             | scf_118                       | 501                     |
| Malate dehydrogenase                                                 | mlate<br>(mdh)  | MBHS_01386<br>MBHS_01427<br>MBHS_02883 | scf_330<br>scf_334<br>scf_464 | 327<br>323<br>327       |

N.d : No data.

Between brackets is indicate the synonymous gene name or possible substitute of the common gene in the cycle.

Question marks indicate that the presence of the gene encoding for a product is unknown in “*CaVi*”’s draft genome.

**S3B Table. Genes involved in glycolysis identified in “*Ca V. ishoeyi*”.**

| Glycolysis                                            |      |                          |                    |                         |
|-------------------------------------------------------|------|--------------------------|--------------------|-------------------------|
| Product                                               | Gene | Locus                    | Scaffold ID        | Length protein sequence |
| glucokinase                                           | glk  | MBHS_01584<br>MBHS_03624 | scf_355<br>scf_478 | 317<br>472              |
| polyphosphate glucokinase                             | ppgk | Not in “ <i>CaVi</i> ”   | n.d                | n.d                     |
| glucose-6-phosphate isomerase                         | pgi  | MBHS_02041               | scf_430            | 543                     |
| 6-phosphofructokinase,<br>pyrophosphate dependent     | pfk  | Not in “ <i>CaVi</i> ”   | n.d                | n.d                     |
| bisphosphate aldolase A                               | fbaA | MBHS_02512               | scf_452            | 343                     |
| bisphosphate aldolase B                               | fbaB | MBHS_03550               | scf_477            | 350                     |
| glyceraldehyde-3-phosphate<br>dehydrogenase           | gapA | MBHS_03668               | scf_478            | 334                     |
| phosphoglycerate kinase                               | pgk  | MBHS_03671               | scf_481            | 392                     |
| phosphoglycerate mutase                               | gpmA | MBHS_00405               | scf_59             | 103                     |
| enolase                                               | eno  | ?                        | n.d                | n.d                     |
| pyruvate kinase II                                    | pykA | MBHS_03673               | scf_478            | 493                     |
| pyruvate dehydrogenase E1<br>component                | aceE | MBHS_02952               | scf_465            | 886                     |
| dihydrolipoamide acetyltransferase<br>E2 component    | aceF | MBHS_02953               | scf_465            | 452                     |
| pyruvate dehydrogenase E1<br>component, alpha subunit | pdhA | Not in “ <i>CaVi</i> ”   | 1.2.4.1            | 158                     |
| pyruvate dehydrogenase E1<br>component, beta subunit  | pdhB | Not in “ <i>CaVi</i> ”   | 1.2.4.1            | 190                     |
| dihydrolipoamide acetyltransferase<br>E2 component    | pdhC | Not in “ <i>CaVi</i> ”   | 2.3.1.12           | 266                     |
| dihydrolipoamide dehydrogenase                        | lpd  | MBHS_01805<br>MBHS_02606 | scf_382<br>scf_450 | 467<br>469              |

N.d : No data.

Between brackets is indicate the synonymous gene name or possible substitute of the common gene in the cycle.

Question marks indicate that the presence of the gene encoding for a product is unknown in genome of “*Ca V. ishoeyi*”.

**S3C Table. Genes involved in the Calvin-Benson-Bassham cycle identified in “*Ca V. ishoeyi*”.**

| Calvin-Benson-Bassham cycle                           |                |                        |             |                         |
|-------------------------------------------------------|----------------|------------------------|-------------|-------------------------|
| Product                                               | Gene           | Locus                  | Scaffold ID | Length protein sequence |
| Ribulose biphosphate carboxylase large chain, form I  | rbcL           | ?                      | n.d         | n.d                     |
| Ribulose biphosphate carboxylase large chain, form II | rbcM           | ?                      | n.d         | n.d.                    |
| Ribulose biphosphate carboxylase                      | cbbM           | MBHS_00487             | scf_74      | 314                     |
| Ribulose biphosphate carboxylase small subunit        | rbcS           | Not in “ <i>CaVi</i> ” | n.d         | n.d                     |
| Phosphoglycerate kinase                               | pgk            | MBHS_03672             | scf_478     | 392                     |
| Fructose-1,6-bisphosphatase                           | fbp            | Not in “ <i>CaVi</i> ” | n.d         | n.d                     |
| Transketolase                                         | tkt<br>(tktA)  | MBHS_03667             | scf_47      | 657                     |
| Pyrophosphate dependent 6-phosphofructokinase         | ppi-PFK        | MBHS_03099             | scf_468     | 419                     |
| Ribose-5-phosphatisomerase                            | cbbI<br>(rpiA) | MBHS_04205             | scf_489     | 218                     |
| Phosphoribulokinase                                   | PrkA<br>(cfxp) | MBHS_00162             | scf_42      | 295                     |

N.d : No data.

Between brackets is indicate the synonymous gene name or possible substitute of the common gene in the cycle.

Question marks indicate that the presence of the gene encoding for a product is unknown in genome of “*Ca V. ishoeyi*”.
