# Supplementary material for: Genomic features of “Candidatus Venteria ishoeyi”, a new sulfur-oxidizing macrobacterium from the Humboldt Sulfuretum off Chile
Source: PubMed Central journal article supplement (PMC5728499; doi:10.1371/journal.pone.0188371), 2017-12-13
Supplement: pone.0188371.s006.pdf [file pone.0188371.s006.pdf]

**S4A Table. List of CRISPR repeats identified in “*Ca. V. ishoeyi*”.** The table shows: scaffolds containing start and end of CRISPR repeat regions, Direct Repeat (DR) sequences, length of the DR, and number of spacers.

| Scaffold | Crispr begin position | Crispr end position | Direct Repeat                            | Length | Number of spacers |
|----------|-----------------------|---------------------|------------------------------------------|--------|-------------------|
| Scf_79   | 5283                  | 6218                | 1 – GTTTCAGGCATGCTGGCCGCTAAGGCTATTGAAAC  | 35     | 14                |
| Scf_137  | 45                    | 744                 | 2 – ATGTTCCCCACGCCAGTGGGGATGAACCG        | 29     | 12                |
| Scf_146  | 1760                  | 2037                | 3 – TCTGTTGACGATTTAGATTGTAAAAA           | 26     | 4                 |
| Scf_160  | 23                    | 699                 | 4 – GTCTCAATAGCCTAAGCGGCTGACCCTGCTGCAAC  | 35     | 10                |
| Scf_160  | 7256                  | 7435                | 5 – GTCTCAATAGCCTAAGCGGCTGACCCTGCTGCAAC  | 35     | 3                 |
| Scf_179  | 2                     | 1190                | 6 – CGGTTTCATCCCCACTGGCGTGGGGAACAT       | 29     | 20                |
| Scf_351  | 6361                  | 7169                | 7 – TTTCTAAGCTGCCTGTGCGGCAGTCAAC         | 28     | 14                |
| Scf_355  | 7                     | 514                 | 8 – TTTCTAAGCTGCCTGTGCGGCAGTCAAC         | 28     | 9                 |
| Scf_355  | 69212                 | 71101               | 9 – TTTCTAAGCTGCCTGTGCGGCAGTCAAC         | 28     | 32                |
| Scf_422  | 530                   | 908                 | 10 – GTTTCAATAGCCTTAGCGGCCAGCATGCCTGAAAC | 35     | 6                 |
| Scf_456  | 31078                 | 32520               | 11 – GTTACGAATCCCCATGAGGGGTTATGAG        | 28     | 23                |
| Scf_464  | 84239                 | 84449               | 12 – GAAACACCCCCACGGGCGTGGGGAAGAC        | 28     | 4                 |
| Scf_473  | 44                    | 3276                | 13 – GTTACGAATCCCCATGAGGGGTTATGAG        | 28     | 51                |
| Scf_479  | 18897                 | 19618               | 14 – GTTTCAATAGCCTTAGCGGCCAGCATGCCTGAAAC | 35     | 11                |
| Scf_483  | 110535                | 111464              | 15 – GTTGACTGCCGCACAGGCAGCTTAGAAA        | 28     | 16                |
| Scf_483  | 112279                | 118854              | 16 – GTTGACTGCCGCACAGGCAGCTTAGAAA        | 28     | 110               |
| Scf_490  | 114080                | 115160              | 17 – GTTTCAGACGCGTTGGCCGTTTAGGCTGTTGAAAC | 35     | 16                |
| Scf_490  | 121113                | 121928              | 18 – GTTTCAGACGCGTTGGCCGTTTAGGCTGTTGAAAC | 35     | 12                |

**S4B Table. CRISPR-associated protein encoding genes, identified in “*Ca. V. ishoeyi*”.**

| <b>Scaffold</b> | <b>Strand</b> | <b>Gene</b> | <b>CDS star</b> | <b>CDS end</b> | <b>ID</b>  | <b>Product</b>                                             |
|-----------------|---------------|-------------|-----------------|----------------|------------|------------------------------------------------------------|
| Scf_160         | -             | cas2        | 967             | 1245           | MBHS_00980 | CRISPR-associated endoribonuclease Cas2                    |
| Scf_160         | -             | cas4-cas1   | 2339            | 3475           | MBHS_00983 | CRISPR-associated protein Cas4/endonuclease Cas1 fusion    |
| Scf_160         | +             | ?           | 8831            | 9514           | MBHS_00987 | CRISPR-associated protein                                  |
| Scf_160         | +             | ?           | 10785           | 11822          | MBHS_00989 | CRISPR-associated protein (Cas_Cmr3)                       |
| Scf_160         |               | ?           | 11933           | 12847          | MBHS_00990 | RAMP superfamily protein                                   |
| Scf_160         | +             | cmr5        | 12844           | 13227          | MBHS_00991 | CRISPR system Cmr subunit Cmr5                             |
| Scf_160         |               | ?           | 13220           | 14398          | MBHS_00992 | RAMP superfamily protein                                   |
| Scf_160         | +             | ?           | 15861           | 17156          | MBHS_00995 | CRISPR-associated protein (Cas_Cas02710)                   |
| Scf_246         | +             | cas3        | 1490            | 2332           | MBHS_01151 | CRISPR-associated nuclease/helicase Cas3                   |
| Scf_246         | +             | casA        | 2680            | 4266           | MBHS_01153 | CRISPR system Cascade subunit CasA                         |
| Scf_246         | +             | ?           | 4282            | 4752           | MBHS_01154 | CRISPR-associated protein Cse2 (CRISPR_cse2)               |
| Scf_246         | +             | casC        | 4765            | 5832           | MBHS_01155 | CRISPR system Cascade subunit CasC                         |
| Scf_246         | +             | casD        | 5777            | 6631           | MBHS_01156 | CRISPR system Cascade subunit CasD                         |
| Scf_246         | +             | casE        | 6618            | 7253           | MBHS_01157 | CRISPR system Cascade subunit CasE                         |
| Scf_355         | -             | cas6f       | 646             | 1227           | MBHS_01570 | CRISPR-associated endonuclease Cas6/Csy4                   |
| Scf_355         | -             | csy3        | 1232            | 2272           | MBHS_01571 | CRISPR-associated protein Csy3                             |
| Scf_355         | -             | csy2        | 2349            | 3242           | MBHS_01572 | CRISPR-associated protein Csy2                             |
| Scf_355         | -             | csy1        | 3239            | 4483           | MBHS_01573 | CRISPR-associated protein Csy1                             |
| Scf_355         | -             | cas3        | 5036            | 8350           | MBHS_01575 | CRISPR-associated nuclease/helicase Cas3 subtype I-F/YPEST |
| Scf_355         | -             | cas1        | 8347            | 9294           | MBHS_01576 | CRISPR-associated endonuclease Cas1                        |
| Scf_355         | +             | csy3        | 71387           | 71665          | MBHS_01645 | CRISPR-associated protein Csy3                             |
| Scf_385         | +             | cas6        | 69993           | 70679          | MBHS_01872 | CRISPR-associated endonuclease Cas6                        |
| Scf_456         | +             | ?           | 21438           | 22175          | MBHS_02775 | CRISPR associated protein Cas6                             |
| Scf_456         | +             | cas1        | 29452           | 30420          | MBHS_02781 | CRISPR-associated endonuclease Cas1                        |
| Scf_456         | +             | cas2        | 30617           | 30919          | MBHS_02782 | CRISPR-associated endoribonuclease Cas2                    |

|         |   |           |        |        |            |                                                         |
|---------|---|-----------|--------|--------|------------|---------------------------------------------------------|
| Scf_479 | + | ?         | 3152   | 5212   | MBHS_03732 | RAMP superfamily protein                                |
| Scf_479 | - | ?         | 6742   | 7470   | MBHS_04050 | RAMP superfamily protein                                |
| Scf_479 | + | ?         | 8653   | 10053  | MBHS_03734 | RAMP superfamily protein                                |
| Scf_479 | + | cas4-cas1 | 13890  | 16403  | MBHS_03740 | CRISPR-associated protein Cas4/endonuclease Cas1 fusion |
| Scf_479 | + | cas2b     | 16400  | 16678  | MBHS_03741 | CRISPR-associated endonuclease Cas2 2                   |
| Scf_490 | + | cas2      | 120558 | 120836 | MBHS_04318 | CRISPR-associated endoribonuclease Cas2                 |
| Scf_490 | + | ?         | 125509 | 127728 | MBHS_04320 | RAMP superfamily protein                                |
| Scf_490 | + | ?         | 130994 | 132406 | MBHS_04323 | RAMP superfamily protein                                |

Question marks indicate that the gene name is unknown for the product coding in the CDS listed.
